# Supplementary material for: Reduced Introgression of Sex Chromosome Markers in the Mexican Howler Monkey (Alouatta palliata × A. pigra) Hybrid Zone
Source: PubMed Central journal article supplement (PMC6394575; doi:10.1007/s10764-018-0056-4), 2018-09-14

**Figure S1****Ap68**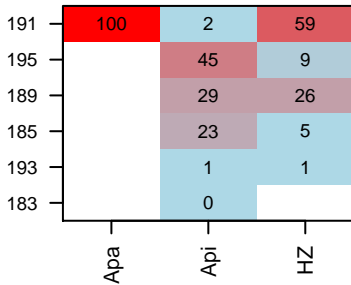**Ap74**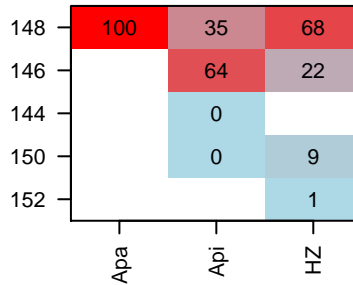**D5S111**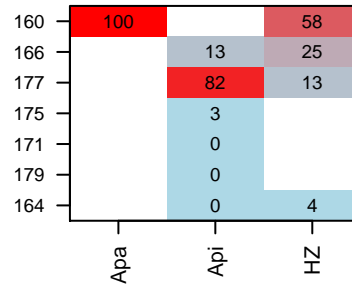**D6S260**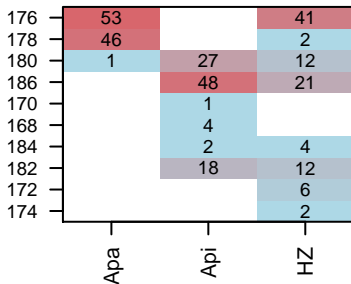**D8S165**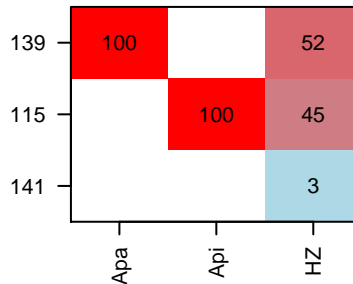**D14S51**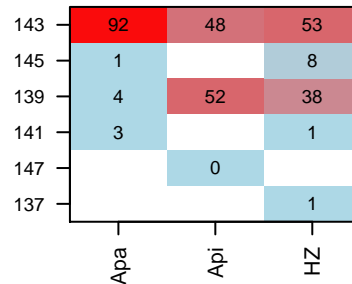**D17S804**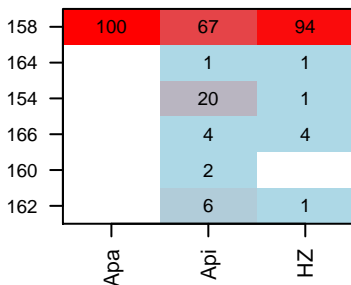**PEPC8**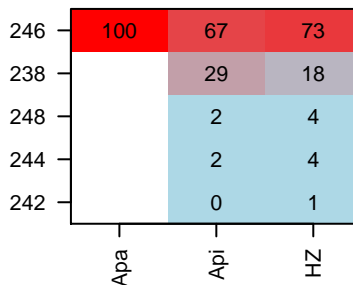**Ab20**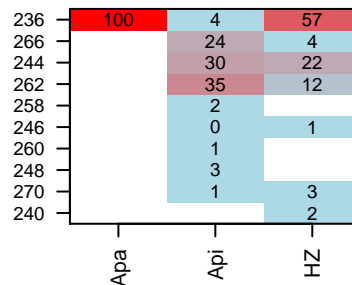

**Apm1**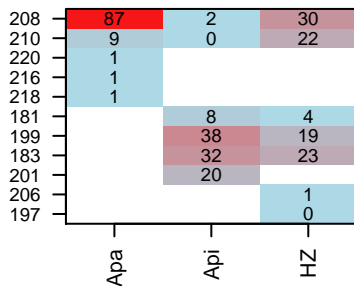**Apm4**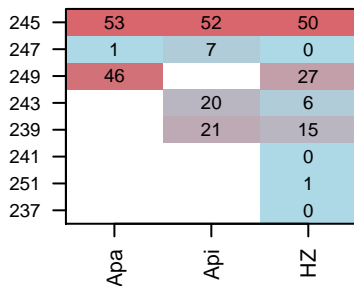**Ab06**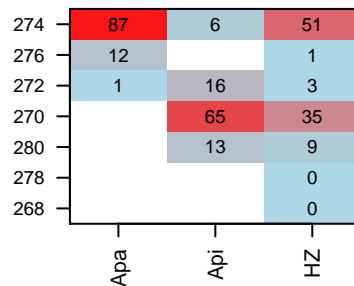**Ab07**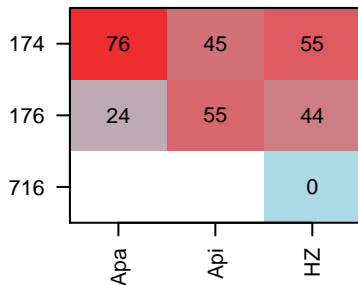**Ab09**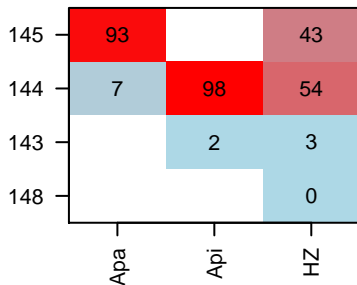**Ab12**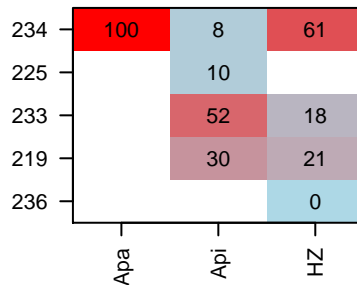**Ab16**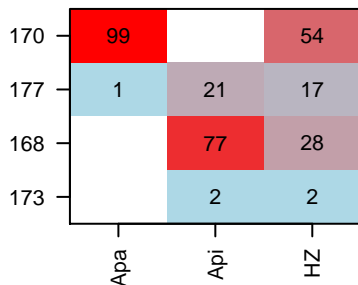**Ab17**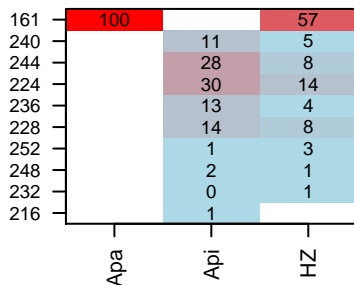**Apm6**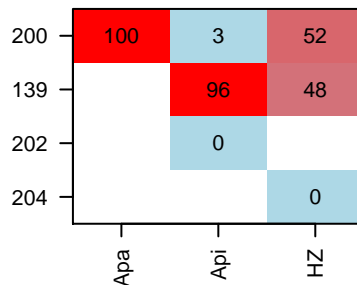

**Apm9**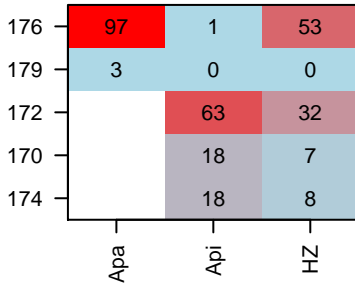**Api6**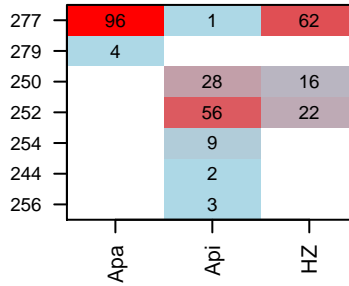**Api7**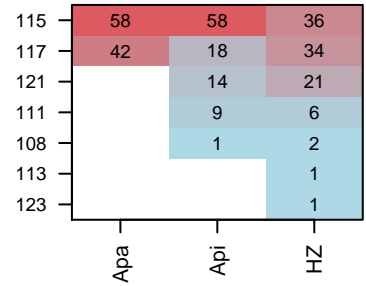**Api8**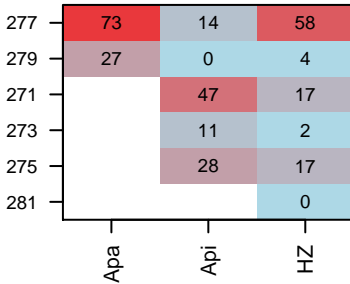**Api9**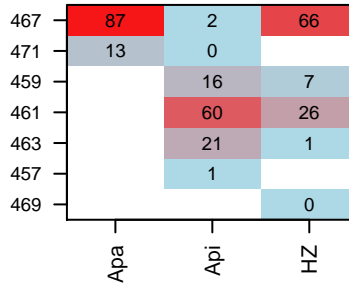**Api11**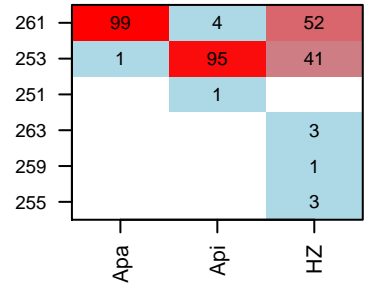**Api14**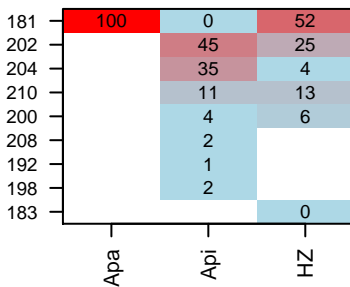**M1110**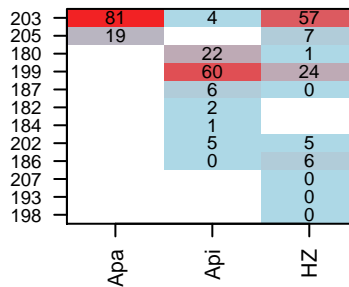**M157**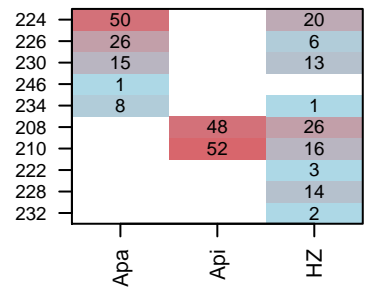

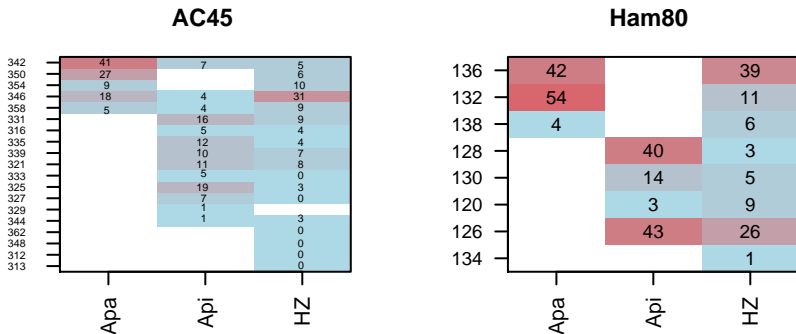

**Fig. S1** Per locus heat maps showing the frequencies of alleles (presented as the percentages) by population. For each locus, alleles are denoted by size on the y-axis; populations are on the x-axis (Apa = *A. palliata* sampled outside the hybrid zone, Api = *A. pigra* sampled outside the hybrid zone, and HZ = individuals sampled in the hybrid zone). In the plot area, warmer colors indicate a higher percentage of individuals with a given genotype. Percentages  $\leq 0.5$  were rounded down to 0. We dropped from analyses loci where the most common allele in Apa was also the most common allele in Api. This included D17S804, PEPC8, Apm4, and Api07. We also dropped Ab07 because although the most common allele was different between populations, alternative alleles were present at nearly equal frequency in Api and the locus was not near fixation in Apa.

**Figure S2A**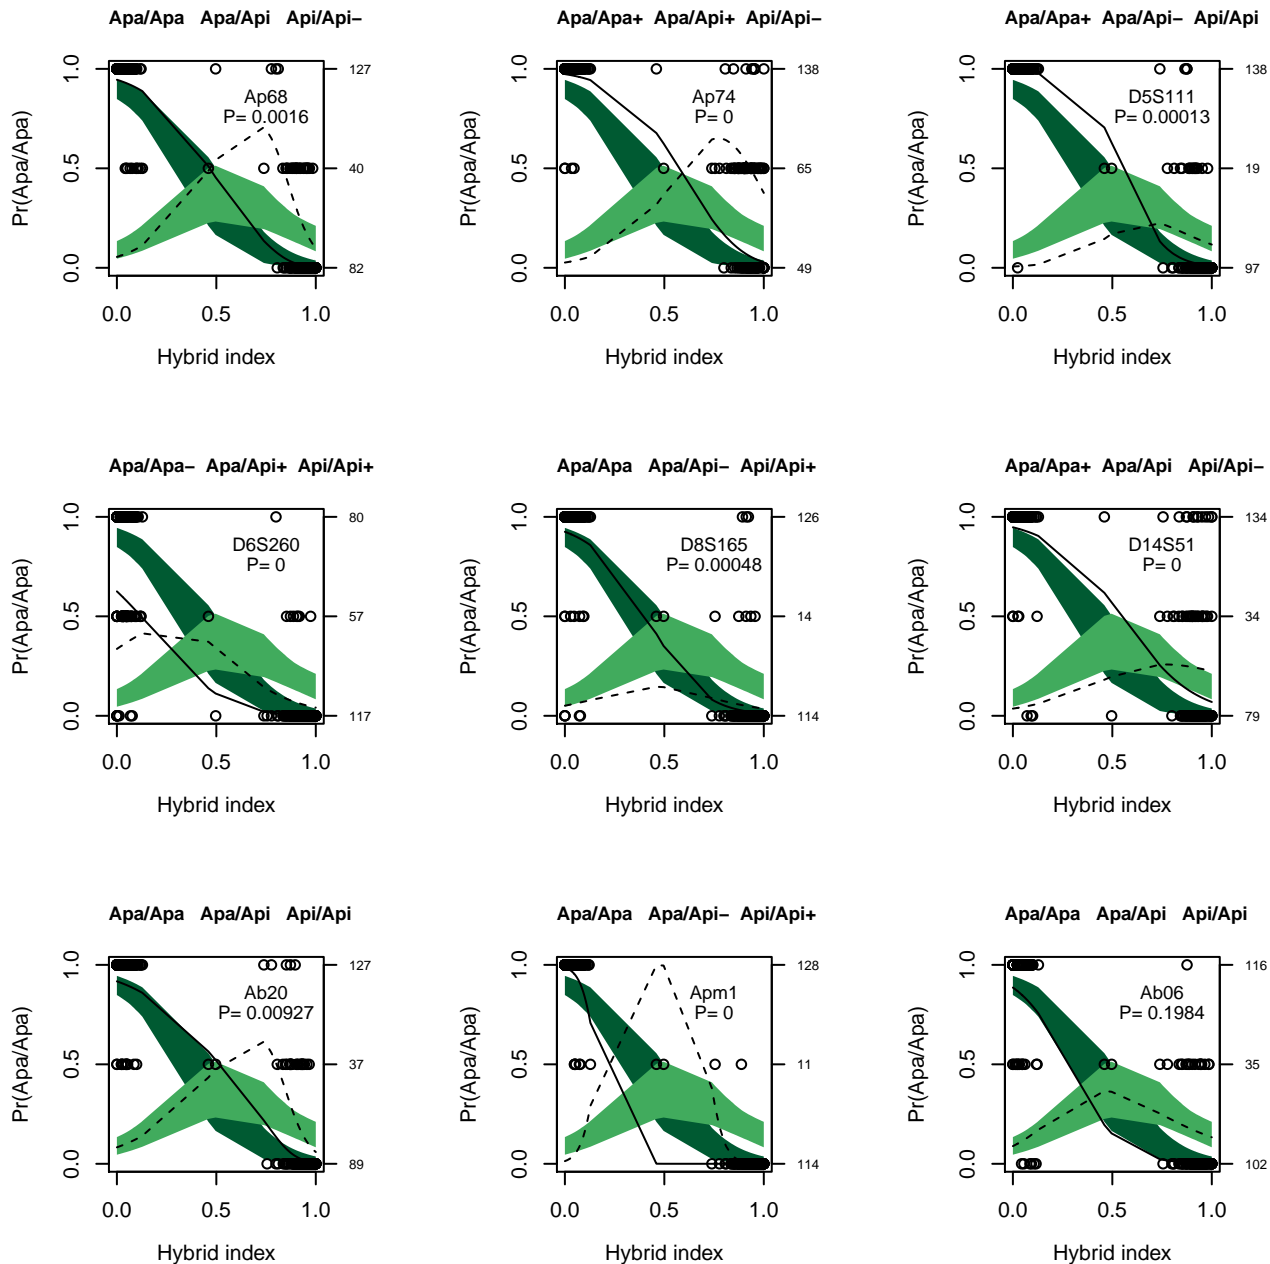

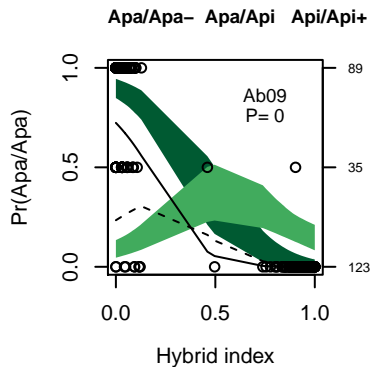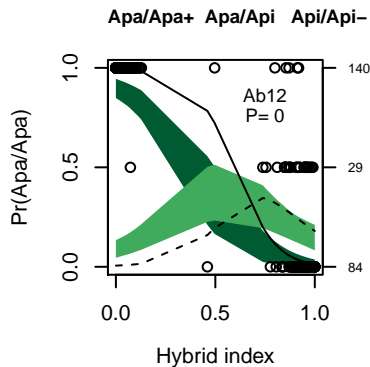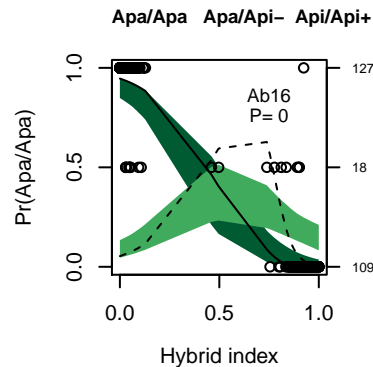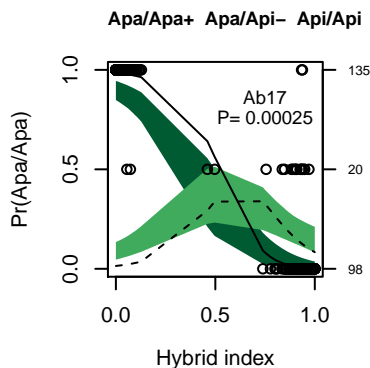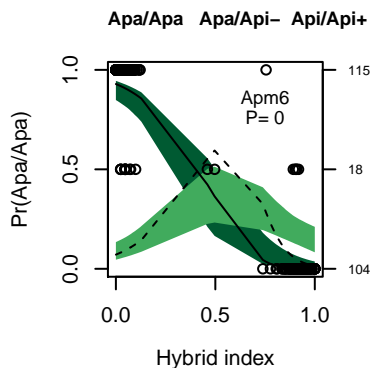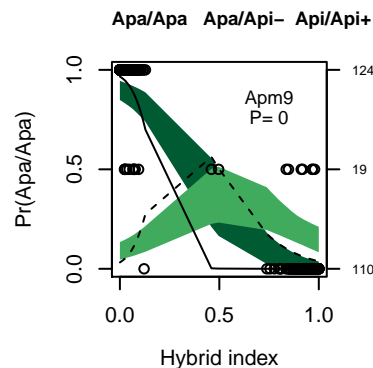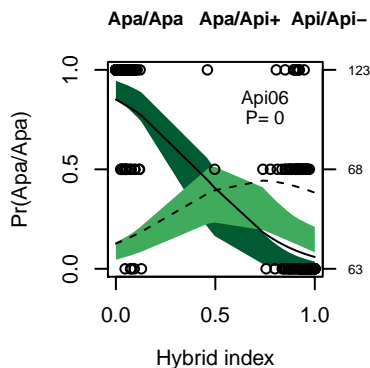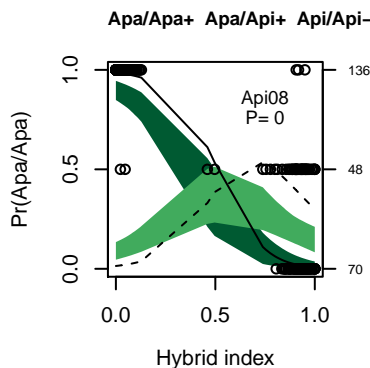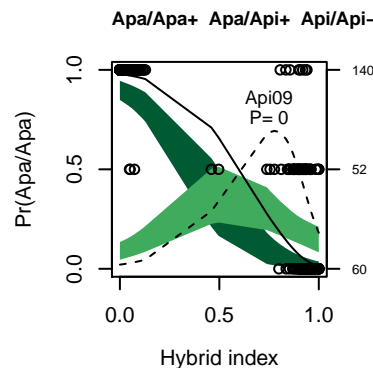

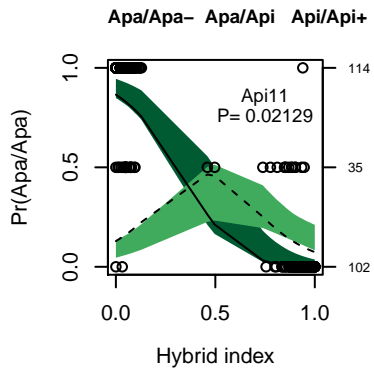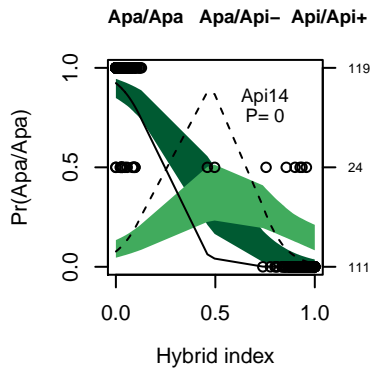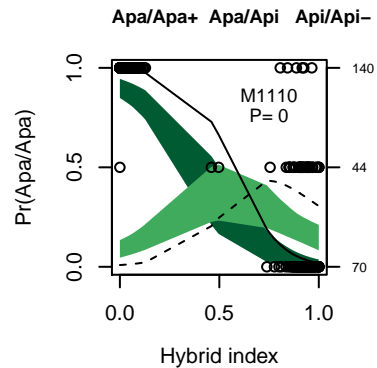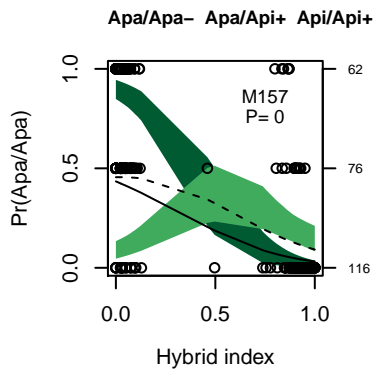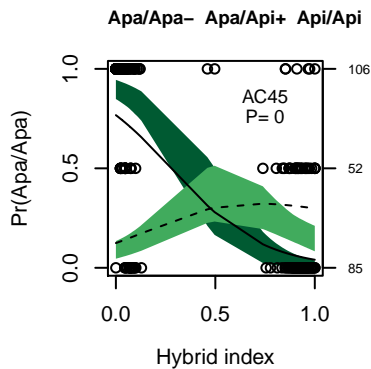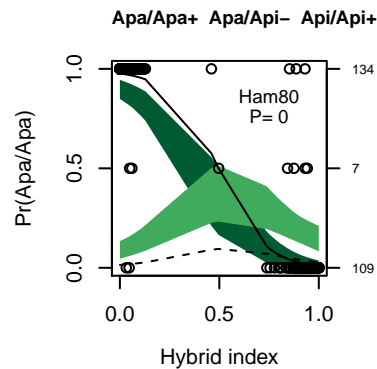

# Figure S2B

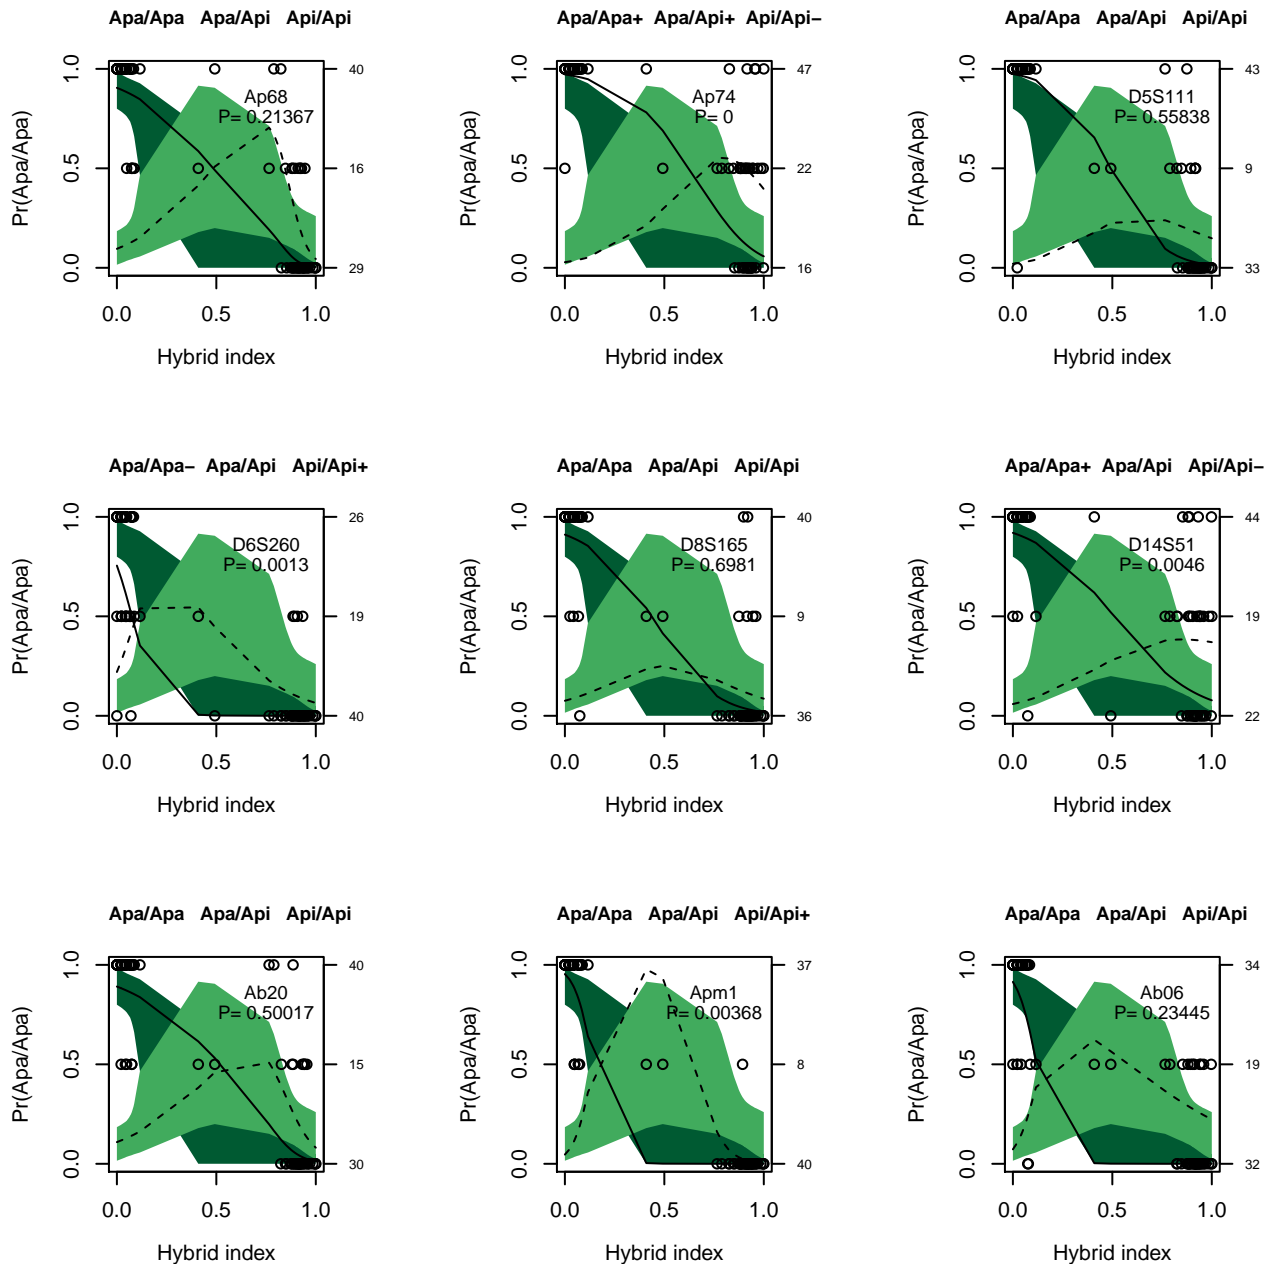



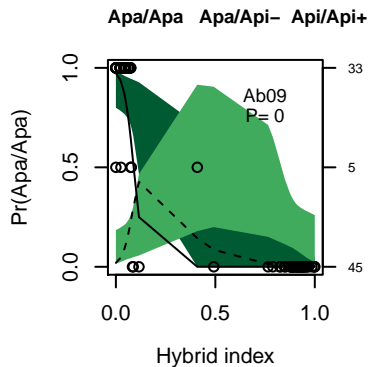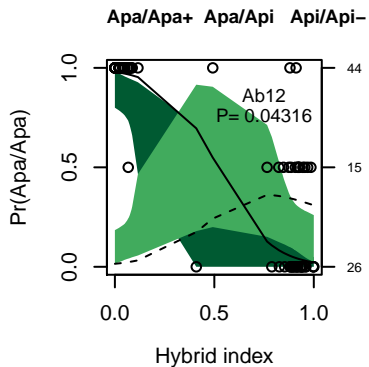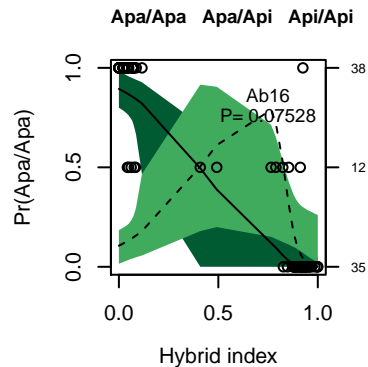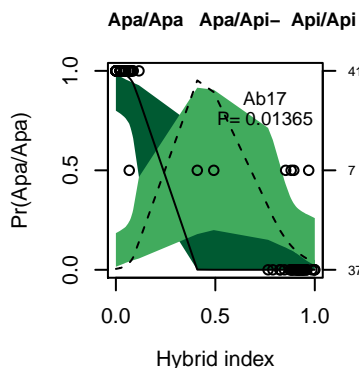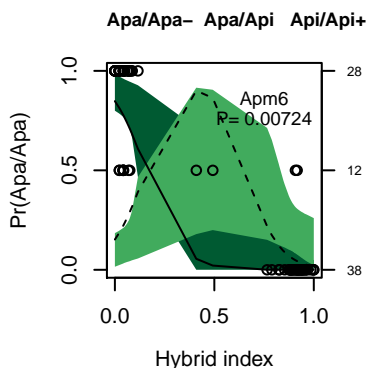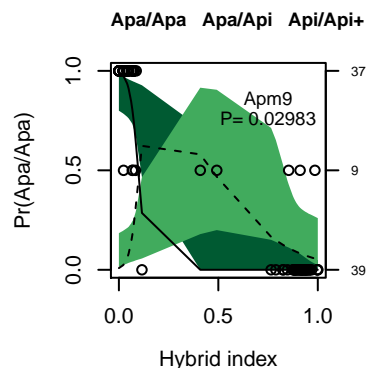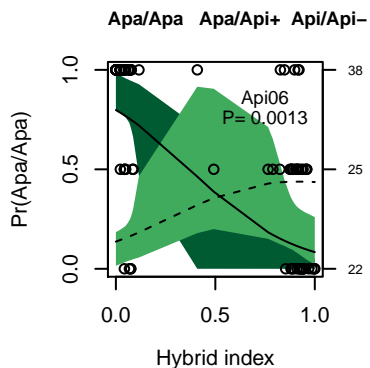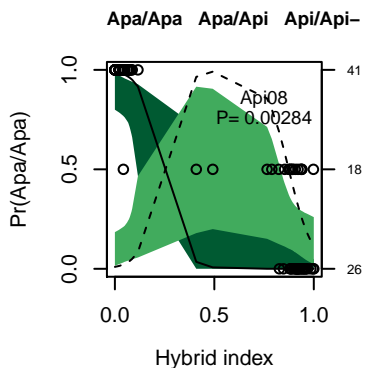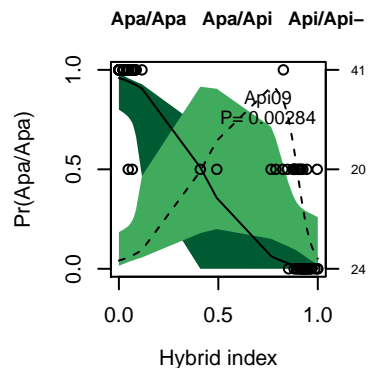

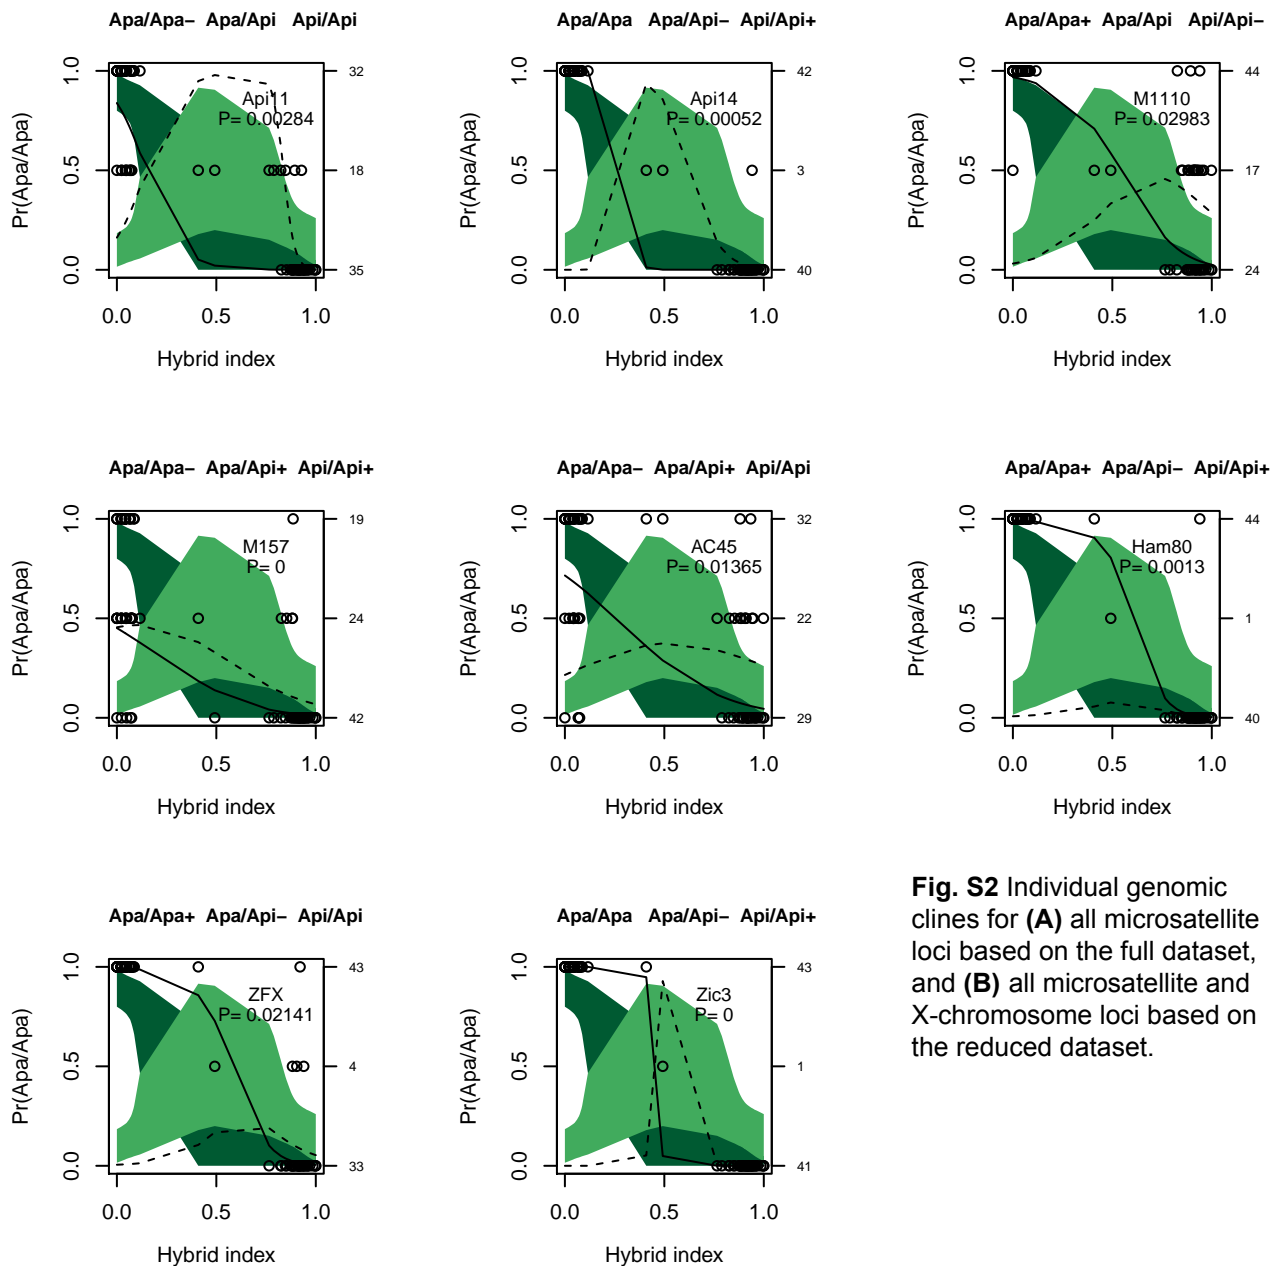

**Fig. S2** Individual genomic clines for **(A)** all microsatellite loci based on the full dataset, and **(B)** all microsatellite and X-chromosome loci based on the reduced dataset.

Figure S3

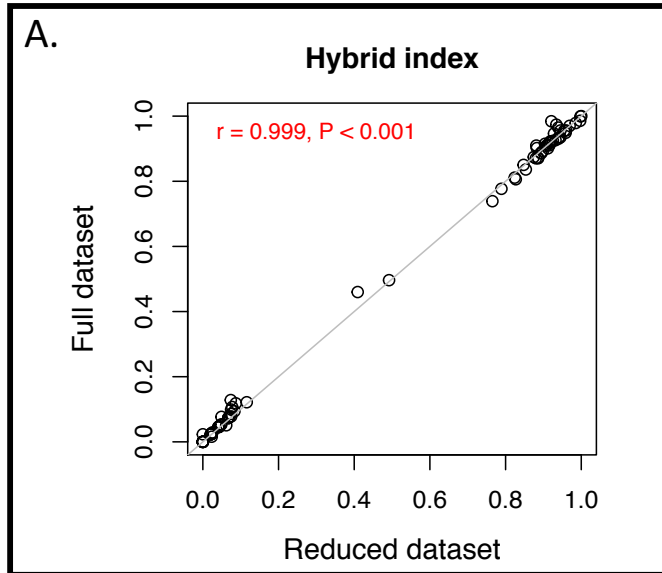

**Fig. S3** A) Comparison and distribution of hybrid index (HI) scores in 85 individuals that were present in both full and reduced datasets used in this study. B) The similar bimodal distribution of hybrid genotypes suggests that the reduction of the number of individuals and addition of two X-linked loci did not impact our ability to detect admixed individuals.

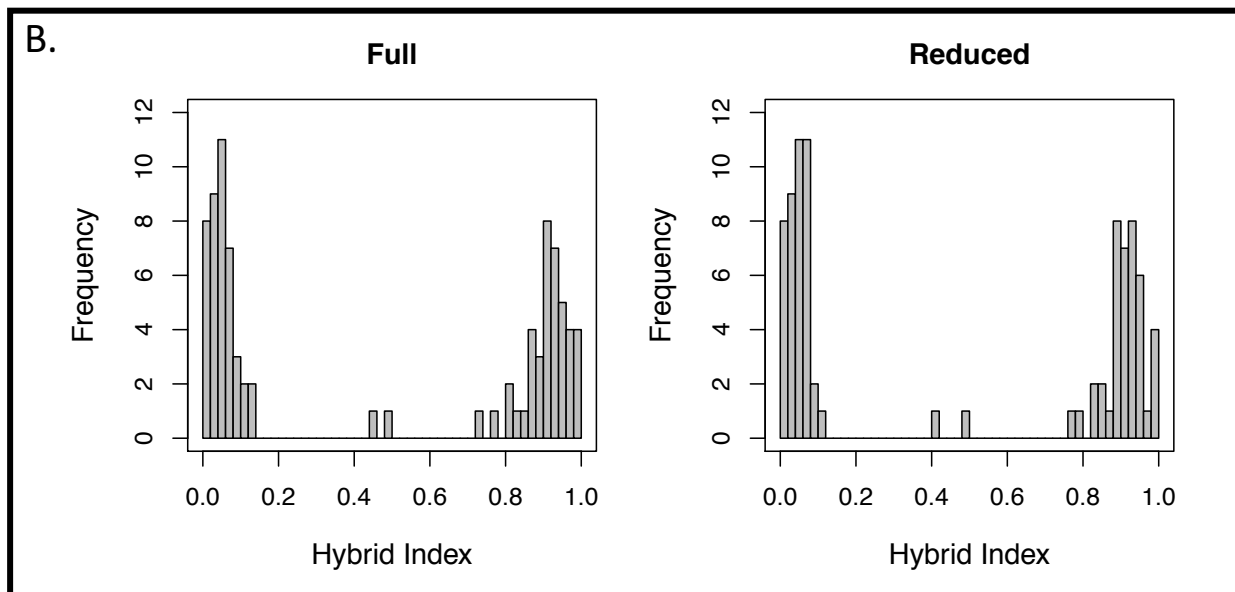

Supplement: 10764_2018_56_MOESM1_ESM.pdf [file 10764_2018_56_MOESM1_ESM.pdf]
