# Supplementary material for: Reduced Introgression of Sex Chromosome Markers in the Mexican Howler Monkey (Alouatta palliata × A. pigra) Hybrid Zone
Source: PubMed Central journal article supplement (PMC6394575; doi:10.1007/s10764-018-0056-4), 2018-09-14
Supplement: 10764_2018_56_MOESM2_ESM.pdf [file 10764_2018_56_MOESM2_ESM.pdf]

## Electronic Supplementary Material

### Reduced Introgression of Sex Chromosome Markers in the Mexican Howler Monkey

(*Alouatta palliata* × *A. pigra*) Hybrid Zone

Liliana Cortés-Ortiz · Marcella D. Baiz · Javier Hermida-Lagunes · Francisco García-Orduña · Ariadna Rangel-Negrín · Dawn M. Kitchen · Thore J. Bergman · Pedro A. D. Dias · Domingo Canales-Espinosa

**Table SI** List of groups and individuals analyzed in this study. Because howler monkeys are heavily captured for pet trade in Mexico we refrain from disclosing the exact locations of the groups studied here. The coordinate data of our sampled groups are available from the corresponding author on reasonable request.

| Group ID | Latitude | Longitude | Phenotype of individuals in groups | General locality | In the hybrid zone? | No. of individuals per group used in analyses |
|----------|----------|-----------|------------------------------------|------------------|---------------------|-----------------------------------------------|
| A        | 17.9958  | -95.1756  | <i>A. palliata</i>                 | Ver              | N                   | 5 (1M, 4F)                                    |
| D        | 17.9886  | -95.1992  | <i>A. palliata</i>                 | Ver              | N                   | 6 (2M, 4F)                                    |
| I        | 17.9886  | -95.1992  | <i>A. palliata</i>                 | Ver              | N                   | 2 (2M)                                        |
| J        | 17.9958  | -95.1756  | <i>A. palliata</i>                 | Ver              | N                   | 2 (1M, 1F)                                    |
| K        | 17.9958  | -95.1756  | <i>A. palliata</i>                 | Ver              | N                   | 2 (2M)                                        |
| R        | 17.6425  | -95.1378  | <i>A. palliata</i>                 | Ver              | N                   | 5 (2M, 3F)                                    |
| Y        | 17.9958  | -95.1756  | <i>A. palliata</i>                 | Ver              | N                   | 6 (2M, 4F)                                    |
| 78       | 18.4405  | -95.0495  | <i>A. palliata</i>                 | Ver              | N                   | 5 (3M, 2F)                                    |
| 79       | 18.0184  | -95.1183  | <i>A. palliata</i>                 | Ver              | N                   | 6 (5M, 1F)                                    |
| L        | 18.8629  | -90.7691  | <i>A. pigra</i>                    | Camp             | N                   | 3 (2M, 1F)                                    |
| M        | 19.3333  | -90.6333  | <i>A. pigra</i>                    | Camp             | N                   | 3 (2M, 1F)                                    |
| U        | 17.9916  | -88.8339  | <i>A. pigra</i>                    | Q. Roo           | N                   | 4 (2M, 2F)                                    |
| V        | 19.0530  | -88.4311  | <i>A. pigra</i>                    | Q. Roo           | N                   | 4 (2M, 2F)                                    |
| W        | 20.6422  | -87.5872  | <i>A. pigra</i>                    | Q. Roo           | N                   | 4 (2M, 2F)                                    |
| 1        | 18.6954  | -90.8746  | <i>A. pigra</i>                    | Camp             | N                   | 8 (4M, 4F)                                    |
| 2        | 18.6707  | -90.8379  | <i>A. pigra</i>                    | Camp             | N                   | 4 (2M, 2F)                                    |
| 3        | 18.7047  | -90.8859  | <i>A. pigra</i>                    | Camp             | N                   | 4 (3M, 1F)                                    |
| 4        | 18.7511  | -90.9586  | <i>A. pigra</i>                    | Camp             | N                   | 8 (3M, 5F)                                    |
| 5        | 18.7177  | -90.9024  | <i>A. pigra</i>                    | Camp             | N                   | 7 (4M, 3F)                                    |
| 6        | 18.8101  | -90.9811  | <i>A. pigra</i>                    | Camp             | N                   | 3 (2M, 1F)                                    |
| 10       | 18.8962  | -90.8870  | <i>A. pigra</i>                    | Camp             | N                   | 7 (2M, 5F)                                    |
| 10A      | 18.8629  | -90.7691  | <i>A. pigra</i>                    | Camp             | N                   | 4 (2M, 2F)                                    |

|     |         |          |                                           |           |   |             |
|-----|---------|----------|-------------------------------------------|-----------|---|-------------|
| 11  | 18.7885 | -90.9773 | <i>A. pigra</i>                           | Camp      | N | 5 (2M, 3F)  |
| 12  | 18.7623 | -90.9650 | <i>A. pigra</i>                           | Camp      | N | 4 (1M, 3F)  |
| 13  | 18.8109 | -90.9830 | <i>A. pigra</i>                           | Camp      | N | 4 (2M, 2F)  |
| 20A | 18.5703 | -90.4383 | <i>A. pigra</i>                           | Camp      | N | 4 (2M, 2F)  |
| 33  | 18.8085 | -90.9779 | <i>A. pigra</i>                           | Camp      | N | 4 (2M, 2F)  |
| 61  | 16.6349 | -89.6532 | <i>A. pigra</i>                           | Guatemala | N | 8 (3M, 5F)  |
| 65  | 18.6093 | -90.8103 | <i>A. pigra</i>                           | Camp      | N | 6 (4M, 2F)  |
| 66  | 18.6143 | -90.8075 | <i>A. pigra</i>                           | Camp      | N | 7 (5M, 2F)  |
| 67  | 18.6165 | -90.8050 | <i>A. pigra</i>                           | Camp      | N | 4 (1M, 3F)  |
| B   | 17.8422 | -92.9978 | <i>A. palliata</i>                        | Tab       | Y | 5 (1M, 4F)  |
| E   | 17.6752 | -92.6507 | <i>A. palliata</i>                        | Tab       | Y | 4 (1M, 3F)  |
| F   | 17.6742 | -92.6498 | <i>A. palliata</i> and<br><i>A. pigra</i> | Tab       | Y | 3 (1M, 2F)  |
| O   | 17.6639 | -92.6528 | <i>A. palliata</i>                        | Tab       | Y | 5 (1M, 4F)  |
| 14  | 17.6849 | -92.6889 | <i>A. palliata</i>                        | Tab       | Y | 12 (3M, 9F) |
| 22  | 17.7174 | -92.6520 | <i>A. palliata</i>                        | Tab       | Y | 4 (2M, 2F)  |
| 24  | 17.6149 | -92.9025 | <i>A. palliata</i>                        | Tab       | Y | 2 (1M, 1F)  |
| 25  | 17.5953 | -92.9083 | <i>A. palliata</i>                        | Tab       | Y | 6 (2M, 4F)  |

|    |         |          |                                                  |     |   |              |
|----|---------|----------|--------------------------------------------------|-----|---|--------------|
| 26 | 17.5933 | -92.8685 | <i>A. palliata</i>                               | Tab | Y | 4 (2M, 2F)   |
| 42 | 17.6464 | -92.6739 | <i>A. palliata</i>                               | Tab | Y | 14 (3M, 11F) |
| 43 | 17.6455 | -92.6773 | <i>A. palliata</i>                               | Tab | Y | 1 (1F)       |
| 45 | 17.6831 | -92.6708 | <i>A. palliata</i>                               | Tab | Y | 7 (6M, 1 F)  |
| 49 | 17.7039 | -92.6968 | <i>A. palliata</i>                               | Tab | Y | 7 (2M, 5F)   |
| 52 | 17.7304 | -92.5549 | <i>A. palliata</i>                               | Tab | Y | 4 (2M, 2F)   |
| 53 | 17.7253 | -92.5538 | <i>A. palliata</i>                               | Tab | Y | 6 (2M, 4F)   |
| 69 | 17.6456 | -92.6666 | <i>A. palliata</i>                               | Tab | Y | 5 (1M, 4F)   |
| 72 | 17.6365 | -92.6670 | <i>A. palliata</i>                               | Tab | Y | 12 (4M, 8F)  |
| 74 | 17.6349 | -92.6707 | <i>A. palliata</i>                               | Tab | Y | 22 (5M, 17F) |
| 75 | 17.6678 | -92.6542 | <i>A. palliata</i> and<br><i>A. pigra</i>        | Tab | Y | 3 (1M, 2F)   |
| 77 | 17.6591 | -92.6610 | <i>A. palliata</i>                               | Tab | Y | 3 (2M, 1F)   |
| 81 | 17.6466 | -92.6782 | <i>A. palliata</i>                               | Tab | Y | 6 (1M, 5F)   |
| C  | 17.7391 | -92.1342 | <i>A. pigra</i>                                  | Tab | Y | 6 (3M, 3F)   |
| G  | 17.7186 | -92.6584 | <i>A. pigra</i> and <i>A.</i><br><i>palliata</i> | Tab | Y | 3 (1M, 2F)   |
| H  | 17.7100 | -92.6661 | <i>A. pigra</i>                                  | Tab | Y | 3 (1M, 2F)   |
| N  | 17.6634 | -92.6503 | <i>A. pigra</i> and <i>A.</i><br><i>palliata</i> | Tab | Y | 4 (1M, 3F)   |
| P  | 17.6676 | -92.6541 | <i>A. pigra</i>                                  | Tab | Y | 1 (1M)       |
| S  | 17.6933 | -92.6400 | <i>A. pigra</i>                                  | Tab | Y | 5 (2M, 3F)   |
| T  | 17.7293 | -92.5067 | <i>A. pigra</i>                                  | Tab | Y | 4 (3M, 1F)   |
| 15 | 17.7064 | -92.6259 | <i>A. pigra</i>                                  | Tab | Y | 6 (3M, 3F)   |
| 16 | 17.6993 | -92.6482 | <i>A. pigra</i>                                  | Tab | Y | 5 (1M, 4F)   |
| 19 | 17.7281 | -92.5064 | <i>A. pigra</i>                                  | Tab | Y | 4 (2M, 2F)   |
| 20 | 17.7125 | -92.5096 | <i>A. pigra</i>                                  | Tab | Y | 3 (2M, 1F)   |

|    |         |          |                 |     |   |             |
|----|---------|----------|-----------------|-----|---|-------------|
| 21 | 17.7188 | -92.5058 | <i>A. pigra</i> | Tab | Y | 5 (3M, 2F)  |
| 23 | 17.7911 | -92.2897 | <i>A. pigra</i> | Tab | Y | 3 (2M, 1F)  |
| 40 | 17.6597 | -92.6419 | <i>A. pigra</i> | Tab | Y | 2 (1M, 1F)  |
| 41 | 17.6904 | -92.6597 | <i>A. pigra</i> | Tab | Y | 8 (3M, 5F)  |
| 44 | 17.6634 | -92.6502 | <i>A. pigra</i> | Tab | Y | 5 (3M, 2F)  |
| 46 | 17.6628 | -92.6549 | <i>A. pigra</i> | Tab | Y | 12 (6M, 6F) |
| 47 | 17.6373 | -92.5704 | <i>A. pigra</i> | Tab | Y | 6 (2M, 4F)  |
| 48 | 17.6374 | -92.5807 | <i>A. pigra</i> | Tab | Y | 3 (1M, 2F)  |
| 50 | 17.7335 | -92.4931 | <i>A. pigra</i> | Tab | Y | 1 (1F)      |
| 51 | 17.6529 | -92.6313 | <i>A. pigra</i> | Tab | Y | 4 (4F)      |
| 68 | 17.6468 | -92.6665 | <i>A. pigra</i> | Tab | Y | 6 (3M, 3F)  |
| 70 | 17.6375 | -92.6694 | <i>A. pigra</i> | Tab | Y | 6 (1M, 5F)  |
| 71 | 17.6360 | -92.6689 | <i>A. pigra</i> | Tab | Y | 6 (3M, 3F)  |
| 73 | 17.6905 | -92.6597 | <i>A. pigra</i> | Tab | Y | 4 (2M, 2F)  |
| 76 | 17.6671 | -92.6617 | <i>A. pigra</i> | Tab | Y | 5 (2M, 3F)  |

**Table SII** Collection, exportation, and importation permits of samples used in this study

|                     |                                                                                                                                                                                                                                                                                    |
|---------------------|------------------------------------------------------------------------------------------------------------------------------------------------------------------------------------------------------------------------------------------------------------------------------------|
| Collecting permits  | SGPA/DGVS/10637/11 (2011–2012)<br>SGPA/DGVS/03293/10 (2010–2011)<br>CESA/mam/Exp.7739<br>SGPA/DGVS/03676/07 (2007–2008)<br>SGPA/DGVS/01273/06 (2006–2007)<br>SGPA/DGVS/06116 (2005–2006)<br>SGPA/DGVS/03042 (2003–2004)<br>DOO.02–0789 (2001–2002)<br>DOO 750-10070/98 (1998–1999) |
| Exportation permits | CITES: MX 58954 (2012)<br>CITES: 199/2010 (2010)<br>CITES: MX 44458 (2009)<br>CITES: MX 40392 (2008–2009)<br>CITES: SER/A-03-05<br>CITES: MX 20802 (2004)                                                                                                                          |
| Importation permits | CITES: 12US46480A/9 (2013)<br>CITES: 10US10640A/9 (2011)<br>CITES: 09US199659/9 (2009)<br>CITES: 08US178005/9 (2008–2009)<br>CITES: SIM/A-21-03 (2004)<br>CITES: SIM/A007-2001 (2001)                                                                                              |

**Table SIII** PCR conditions for amplification of microsatellite loci, mitochondrial control region, X chromosome loci, and the *SRY* gene

|   | Locus   | Marker type              | PCR cycles                                                                       | Taq type | Used in analyses | Source                                                  |
|---|---------|--------------------------|----------------------------------------------------------------------------------|----------|------------------|---------------------------------------------------------|
| 1 | Ap68    | Autosomal microsatellite | 94° 2 min<br>94° 45 s<br><b>50°</b> 30 s<br>72° 45 s<br>72° 10 min<br>35 cycles  | P-Taq    | Yes              | Ellsworth and Hoelzer (1998)                            |
| 2 | Ap74    | Autosomal microsatellite | 94° 2 min<br>94° 45 s<br><b>52°</b> 30 s<br>72° 45 s<br>72° 10 min<br>35 cycles  | P-Taq    | Yes              | Ellsworth and Hoelzer (1998)                            |
| 3 | D5S111  | Autosomal microsatellite | 94° 2 min<br>94° 45 s<br><b>60°</b> 45 s<br>72° 1 min<br>72° 10 min<br>35 cycles | P-Taq    | Yes              | Research genetics (see Cortés-Ortiz <i>et al.</i> 2010) |
| 4 | D6S260  | Autosomal microsatellite | 94° 2 min<br>94° 45 s<br><b>53°</b> 45 s<br>72° 1 min<br>72° 10 min<br>35 cycles | P-Taq    | Yes              | Research genetics (see Cortés-Ortiz <i>et al.</i> 2010) |
| 5 | D8S165  | Autosomal microsatellite | 94° 5 min<br>94° 30 s<br><b>55°</b> 30 s<br>72° 1 min<br>72° 10 min<br>35 cycles | P-Taq    | Yes              | Research genetics (see Cortés-Ortiz <i>et al.</i> 2010) |
| 6 | D14S51  | Autosomal microsatellite | 94° 5 min<br>94° 45 s<br><b>60°</b> 45 s<br>72° 1 min<br>72° 10 min<br>35 cycles | P-Taq    | Yes              | Research genetics (see Cortés-Ortiz <i>et al.</i> 2010) |
| 7 | D17S804 | Autosomal microsatellite | 94° 2 min<br>94° 45 s<br><b>60°</b> 45 s<br>72° 1 min<br>72° 10 min<br>35 cycles | P-Taq    | No               | Research genetics (see Cortés-Ortiz <i>et al.</i> 2010) |
| 8 | PEPC8   | Autosomal microsatellite | 94° 2 min<br>94° 30 s<br>40 cycles                                               | P-Taq    | No               | Escobar-Páramo (2000)                                   |

|    |      |                          |                                                              |           |       |                                          |
|----|------|--------------------------|--------------------------------------------------------------|-----------|-------|------------------------------------------|
|    |      |                          | 46° 30 s<br>72° 30 s<br>72° 10 min                           |           |       |                                          |
| 9  | Ab06 | Autosomal microsatellite | 94° 2 min<br>94° 30 s<br>60° 30 s<br>72° 45 s<br>72° 10 min  | 35 cycles | P-Taq | Yes<br>Goncalves <i>et al.</i> (2004)    |
| 10 | Ab07 | Autosomal microsatellite | 94° 2 min<br>94° 30 s<br>60° 30 s<br>72° 45 s<br>72° 10 min  | 35 cycles | P-Taq | Yes<br>Goncalves <i>et al.</i> (2004)    |
| 11 | Ab09 | Autosomal microsatellite | 94° 2 min<br>94° 45 s<br>58° 45 s<br>72° 45 s<br>72° 10 min  | 35 cycles | P-Taq | Yes<br>Goncalves <i>et al.</i> (2004)    |
| 12 | Ab12 | Autosomal microsatellite | 94° 2 min<br>94° 30 s<br>65° 30 s<br>72° 45 s<br>72° 10 min  | 35 cycles | P-Taq | Yes<br>Goncalves <i>et al.</i> (2004)    |
| 13 | Ab16 | Autosomal microsatellite | 94° 2 min<br>94° 30 s<br>65° 30 s<br>72° 45 s<br>72° 10 min  | 35 cycles | P-Taq | Yes<br>Goncalves <i>et al.</i> (2004)    |
| 14 | Ab17 | Autosomal microsatellite | 94° 2 min<br>94° 30 s<br>60° 30 s<br>72° 45 s<br>72° 10 min  | 35 cycles | P-Taq | Yes<br>Goncalves <i>et al.</i> (2004)    |
| 15 | Ab20 | Autosomal microsatellite | 94° 2 min<br>94° 30 s<br>67° 30 s<br>72° 1 min<br>72° 10 min | 35 cycles | P-Taq | Yes<br>Goncalves <i>et al.</i> (2004)    |
| 16 | Apm1 | Autosomal microsatellite | 94° 2 min<br>94° 30 s<br>64° 30 s<br>72° 45 s<br>72° 10 min  | 35 cycles | P-Taq | Yes<br>Cortés-Ortiz <i>et al.</i> (2010) |

|    |       |                          |                                                                    |           |           |     |                                   |
|----|-------|--------------------------|--------------------------------------------------------------------|-----------|-----------|-----|-----------------------------------|
| 17 | Apm4  | Autosomal microsatellite | 94° 2 min<br>94° 30 s<br><b>65°</b> 30 s<br>72° 30 s<br>72° 10 min | 35 cycles | P-Taq     | No  | Cortés-Ortiz <i>et al.</i> (2010) |
| 18 | Apm6  | Autosomal microsatellite | 94° 2 min<br>94° 30 s<br><b>55°</b> 30 s<br>72° 45 s<br>72° 10 min | 35 cycles | P-Taq     | Yes | Cortés-Ortiz <i>et al.</i> (2010) |
| 19 | Apm9  | Autosomal microsatellite | 94° 2 min<br>94° 30 s<br><b>55°</b> 30 s<br>72° 45 s<br>72° 10 min | 35 cycles | P-Taq     | Yes | Cortés-Ortiz <i>et al.</i> (2010) |
| 20 | Api06 | Autosomal microsatellite | 94° 2 min<br>94° 30 s<br><b>55°</b> 30 s<br>72° 45 s<br>72° 10 min | 35 cycles | P-Taq     | Yes | Cortés-Ortiz <i>et al.</i> (2010) |
| 21 | Api07 | Autosomal microsatellite | 94° 2 min<br>94° 30 s<br><b>50°</b> 30 s<br>72° 45 s<br>72° 10 min | 35 cycles | P-Taq     | No  | Cortés-Ortiz <i>et al.</i> (2010) |
| 22 | Api08 | Autosomal microsatellite | 94° 2 min<br>94° 30 s<br><b>55°</b> 30 s<br>72° 45 s<br>72° 10 min | 35 cycles | P-Taq     | Yes | Cortés-Ortiz <i>et al.</i> (2010) |
| 23 | Api09 | Autosomal microsatellite | 94° 2 min<br>94° 30 s<br><b>60°</b> 30 s<br>72° 45 s<br>72° 10 min | 35 cycles | Hi-Fi Taq | Yes | Cortés-Ortiz <i>et al.</i> (2010) |
| 24 | Api11 | Autosomal microsatellite | 94° 2 min<br>94° 30 s<br><b>55°</b> 30 s<br>72° 45 s<br>72° 10 min | 35 cycles | Hi-Fi Taq | Yes | Cortés-Ortiz <i>et al.</i> (2010) |

|    |       |                             |                                                                                                                                               |                                                          |           |     |                                   |
|----|-------|-----------------------------|-----------------------------------------------------------------------------------------------------------------------------------------------|----------------------------------------------------------|-----------|-----|-----------------------------------|
| 25 | Api14 | Autosomal microsatellite    | 94° 2 min<br>94° 30 s<br><b>55°</b> 30 s<br>72° 45 s<br>72° 10 min                                                                            | 35 cycles                                                | Hi-Fi Taq | Yes | Cortés-Ortiz <i>et al.</i> (2010) |
| 26 | 1110  | Autosomal microsatellite    | 94° 2 min<br>94° 30 s<br><b>54°</b> 30 s<br>72° 45 s<br>72° 10 min                                                                            | 35 cycles                                                | P-Taq     | Yes | Di Fiore and Fleischer (2004)     |
| 27 | 157   | Autosomal microsatellite    | 94° 2 min<br>94° 30 s<br><b>54°</b> 30 s<br>72° 45 s<br>72° 10 min                                                                            | 35 cycles                                                | P-Taq     | Yes | Di Fiore and Fleischer (2004)     |
| 28 | AC45  | Autosomal microsatellite    | 94° 2 min<br>94° 30 s<br><b>64°</b> 30 s<br>72° 45 s<br>72° 10 min                                                                            | 35 cycles                                                | P-Taq     | Yes | Oklander <i>et al.</i> (2007)     |
| 29 | Ham80 | X-chromosome microsatellite | 94° 2 min<br>94° 30 s<br><b>53°</b> 30 s<br>72° 45 s<br>72° 10 min                                                                            | 35 cycles                                                | P-Taq     | Yes | Katoh <i>et al.</i> (2009)        |
| 30 | Zic3  | X-chromosome gene sequence  | 95° 10 min<br>95° 15 s<br>60-52 °C 30 s (60°C, 58°C, 56°C, 54°C and 52°C)<br>72° 1 min<br><br>95° 15 s<br>50° 30 s<br>72° 1 min<br>72° 30 min | 10 cycles (2 cycles per annealing Temp)<br><br>25 cycles | GoTaq     | Yes | Perelman <i>et al.</i> (2011)     |

|    |        |                             |                                                                                        |                                         |       |     |                                                         |
|----|--------|-----------------------------|----------------------------------------------------------------------------------------|-----------------------------------------|-------|-----|---------------------------------------------------------|
| 31 | Zfx    | X-chromosome gene sequence  | 95° 10 min<br>95° 15 s<br>60-52 °C 30 s (60°C, 58°C, 56°C, 54°C and 52°C)<br>72° 1 min | 10 cycles (2 cycles per annealing Temp) | GoTaq | Yes | Perelman <i>et al.</i> (2011)                           |
|    |        |                             | 95° 15 s<br>50° 30 s<br>72° 1 min<br>72° 30 min                                        | 25 cycles                               |       |     |                                                         |
| 32 | SRY    | Y-chromosome gene sequence  | 94° 2 min<br>94° 30 s<br><b>60°</b> 30 s<br>72° 45 s<br>72° 10 min                     | 35 cycles                               | GoTaq | Yes | Moreira <i>et al.</i> (2002)                            |
| 33 | d-loop | Mitochondrial gene sequence | 94° 2 min<br>94° 30 s<br>51° 30 s<br>72° 45 s<br>72° 10 min                            | 35 cycles                               | GoTaq | Yes | Ascunce <i>et al.</i> (2003); Dunn <i>et al.</i> (2014) |
